# Supplementary material for: Inhibition of Human Neutrophil Functions In Vitro by Multiple Sclerosis Disease-Modifying Therapies
Source: MDPI journal article supplement (doi:10.3390/jcm9113542), 2020-11-02

**Supplemental Table 1.** Effect of DMTs on HS PMN intracellular killing activity of *K. pneumoniae*.

| Mean Survival Index $\pm$ SEM<br>(% of initial microbial population killed by PMNs) |                          |                          |                          |                          |            |                                                                                                                                             |
|-------------------------------------------------------------------------------------|--------------------------|--------------------------|--------------------------|--------------------------|------------|---------------------------------------------------------------------------------------------------------------------------------------------|
| Time<br>(min)                                                                       | Controls                 | First-line treatment     |                          | Second-line treatment    |            | Statistical analysis                                                                                                                        |
|                                                                                     |                          | INF $\beta$ -1b          | GA                       | NAT                      | FTY        | Mann-Whitney test                                                                                                                           |
|                                                                                     | A                        | B                        | C                        | D                        | E          |                                                                                                                                             |
| 30                                                                                  | 1.51 $\pm$ 0.02<br>(49%) | 1.87 $\pm$ 0.01<br>(13%) | 1.77 $\pm$ 0.06<br>(23%) | 1.69 $\pm$ 0.05<br>(31%) | >2<br>(0%) | <i>P</i> = 0.0003 A <i>vs.</i> B<br><i>P</i> = 0.0010 A <i>vs.</i> C<br><i>P</i> = 0.003 A <i>vs.</i> D<br><i>P</i> < 0.0001 A <i>vs.</i> E |
| 60                                                                                  | 1.74 $\pm$ 0.04<br>(26%) | >2<br>(0%)               | 1.94 $\pm$ 0.04<br>(6%)  | 1.96 $\pm$ 0.05<br>(4%)  | >2<br>(0%) | <i>P</i> = 0.0003 A <i>vs.</i> B<br><i>P</i> = 0.04 A <i>vs.</i> C<br><i>P</i> = 0.004 A <i>vs.</i> D<br><i>P</i> < 0.0001 A <i>vs.</i> E   |
| 90                                                                                  | >2<br>(0%)               | >2<br>(0%)               | >2<br>(0%)               | >2<br>(0%)               | >2<br>(0%) | n.s.                                                                                                                                        |

*P* < 0.05 was deemed statistically significant

Abbreviations: DMTs, disease-modifying therapies; HS, healthy subject; PMNs, polymorphonuclear leukocytes; INF $\beta$ -1b, interferon $\beta$ -1b; GA, glatiramer acetate; NAT, natalizumab; FTY, fingolimod

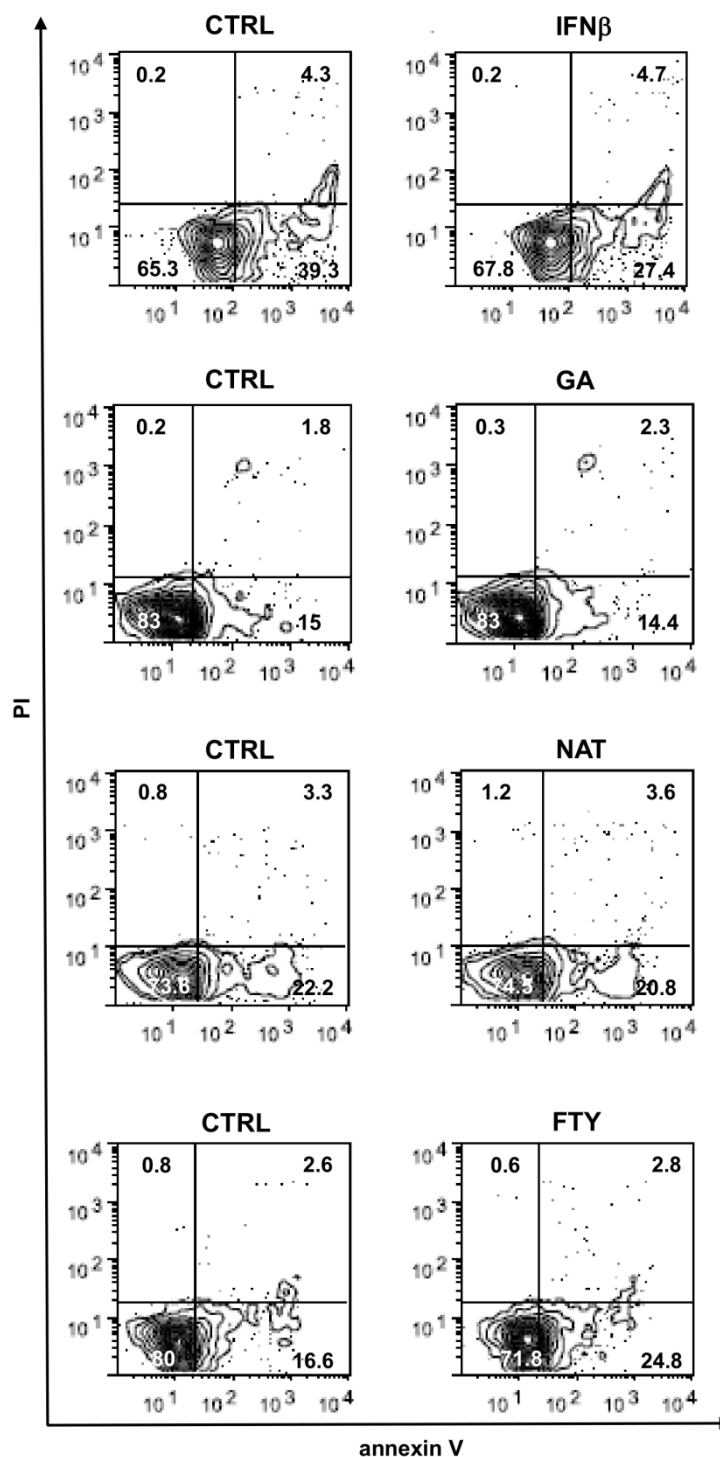

**Supplemental Figure 1.** Effect of DMTs on HS PMN apoptosis. Representative dot plots of untreated (left panels) or DMTs treated PMNs (right panels). Viable cells are presented in the lower left quadrant, early apoptotic cells in the lower right quadrant, late apoptotic cells in the upper right quadrant and unviable cells in the upper left quadrant.

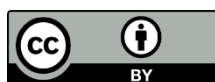

Supplement: s1 [file s1]
